# Supplementary material for: Controlled wettability, same chemistry: biological activity of plasma-polymerized coatings
Source: Royal Society of Chemistry journal article supplement (doi:10.1039/c2sm25413a), 2012-01-01
Supplement: c2sm25413a.pdf [file c2sm25413a.pdf]

## Controlled wettability, same chemistry: Biological activity of plasma-polymerized coatings

Marco Cantini,<sup>\*a,b</sup> Patricia Rico,<sup>a,c</sup> David Moratal<sup>a</sup> and Manuel Salmerón-Sánchez<sup>\*a,c</sup>

<sup>a</sup> Center for Biomaterials and Tissue Engineering, Universidad Politécnica de Valencia, Valencia 46022, Spain. E-mail: marco.l.cantini@mail.polimi.it; masalsan@fis.upv.es

<sup>b</sup> Institute for Bioengineering of Catalonia, Barcelona 08028, Spain

<sup>c</sup> CIBER de Bioingeniería, Biomateriales y Nanomedicina (CIBER-BBN), Valencia46022, Spain

### ELECTRONIC SUPPLEMENTARY INFORMATION

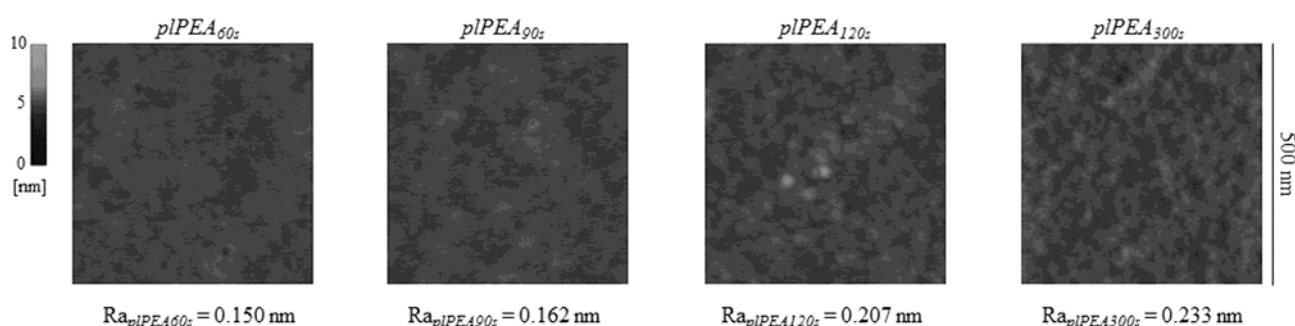

**Supplementary Figure 1.** Surface of the plasma-polymerized coatings as observed via the AFM height signal, with indication of mean roughness (Ra), proving their smoothness and uniformity independently of the duration of the plasma discharge.

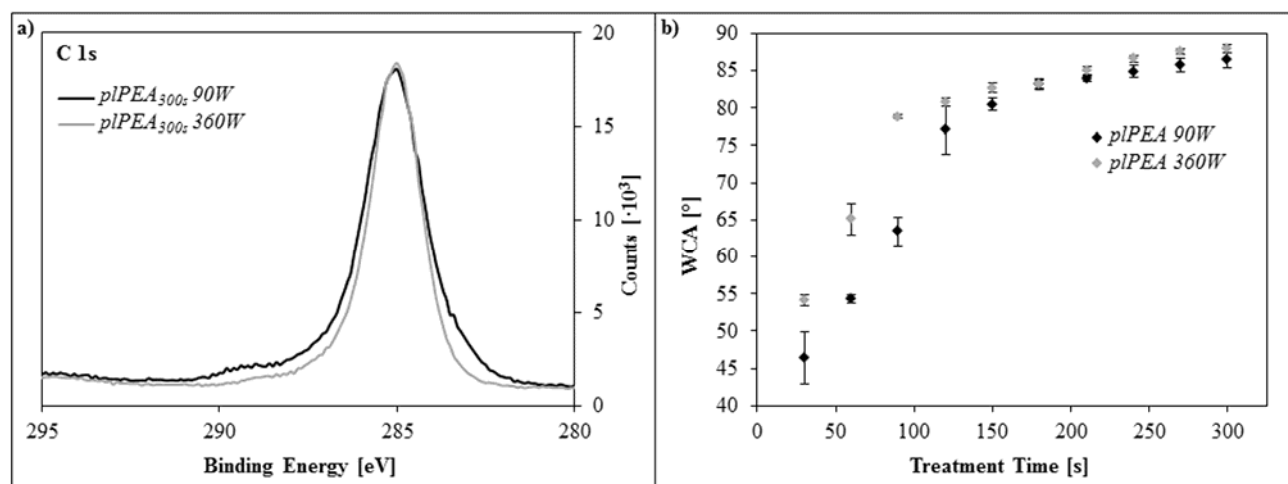

**Supplementary Figure 2.** a) XPS spectrum in the C 1s region of plasma-polymerized PEA with different power (90 and 360 W) for a treatment time of 300s. b) Water Contact Angle (WCA) measurements after treatment with plasma of ethyl acrylate (EA) at increasing times with two different powers (90 and 360 W).

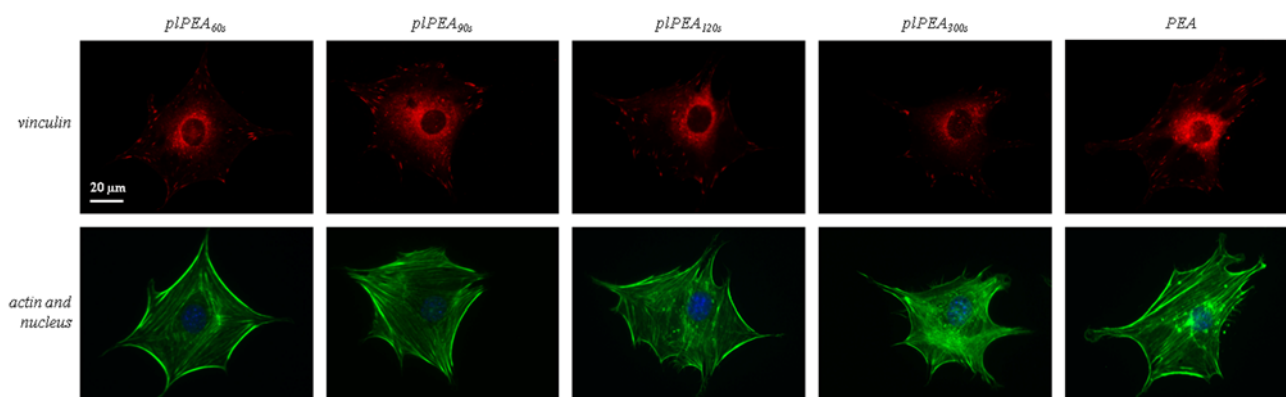

**Supplementary Figure 3.** Focal adhesion protein vinculin (first row), actin cytoskeleton and nuclei (second row) of MC3T3-E1 osteoblast-like cells after 2h of culture on plasma-polymerized PEA (treatment times of 60 s, 90 s, 120 s, and 300 s) and on spin-coated PEA, after fibronectin adsorption from a  $20\mu\text{g mL}^{-1}$  solution in DPBS for 1h.

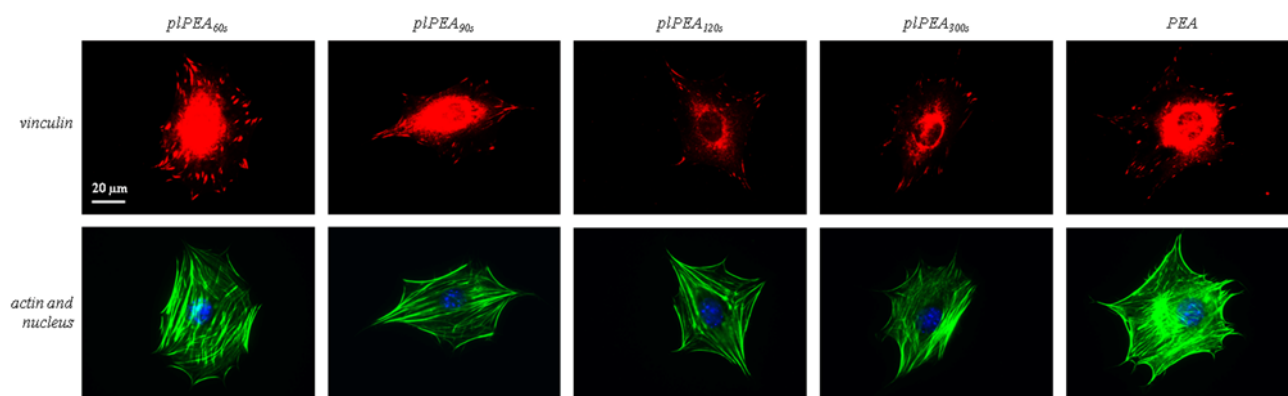

**Supplementary Figure 4.** Focal adhesion protein vinculin (first row), actin cytoskeleton and nuclei (second row) of MC3T3-E1 osteoblast-like cells after 2h of culture on plasma-polymerized PEA (treatment times of 60 s, 90 s, 120 s, and 300 s) and on spin-coated PEA, with a surface density of fibronectin  $\sim 100\text{ ng cm}^{-2}$ .
